# Supplementary material
Source: ML conference proceedings conference paper supplement (https://openreview.net/forum?id=BYKsHDBi7u)
Supplement: supplementary_material [file attachment]

---

# Efficient Equivariant Network

## Supplementary Materials

---

Anonymous Author(s)

Affiliation

Address

email

### 1 A Details of Data Efficient Analysis

2 As shown in table 5 and Figure 3, the test error of all models increase as training data size decrease.  
3 Let’s take a closer look at the gap between different models. First, the gap between R18 and  $p4$ -R18  
4 is 2.17% at 5k and increases to 6.02% at 1k, while the gap between  $p4$ -R18 and  $p4m$ -R18 is 1.7% at  
5 5k and increases to 3.69% at 1k. This indicates symmetry prior of model plays a more important  
6 role when data is less. Then, we compare our models with their corresponding counterparts. The gap  
7 between  $p4$ -R18( $p4m$ -R18) and  $p4$ - $E^4$ R18( $p4m$ - $E^4$ R18) is 1.11%(0.87%) at 5k, and it increase to  
8 5.3%(5.22%) at 1k. Furthermore, in Figure 3, the red line( $p4$ - $E^4$ R18) and blue dash line( $p4m$ -R18)  
9 intersect, which means that  $p4$ - $E^4$ R18 is even more superior than  $p4m$ -R18 when data is less although  
10 the latter one has more capacity when we increase training data. The above results demonstrate  
11 greater data efficiency of  $E^4$  model compared with G-CNNs, or it can better utilize the symmetry  
12 prior of data.

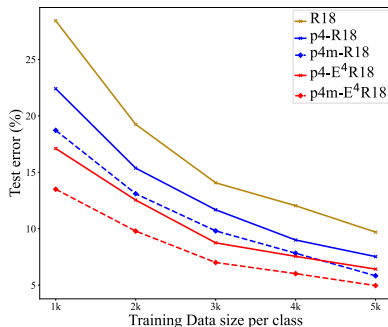

Figure 3: Trend of test error(%) on various training data sizes.

Table 5: Test error(%) of models trained on different training data sizes

| Module/Dataset size     | 1k    | 2k    | 3k    | 4k    | 5k   |
|-------------------------|-------|-------|-------|-------|------|
| R18                     | 28.43 | 19.25 | 14.07 | 12.04 | 9.70 |
| $p4$ -R18               | 22.41 | 15.37 | 11.68 | 9.01  | 7.53 |
| $p4$ - $E^4$ R18(Ours)  | 17.11 | 12.54 | 8.75  | 7.55  | 6.42 |
| $p4m$ -R18              | 18.72 | 13.10 | 9.81  | 7.68  | 5.83 |
| $p4m$ - $E^4$ R18(Ours) | 13.50 | 9.79  | 7.01  | 6.02  | 4.96 |

## 13 B MNIST-rot Model Architecture

Please refer to Table 6.

Table 6: Architecture of  $E^4$ -Net on Mnist-rot classification,  $p$  means dropout rate.

| Layer                                                                              | Kernel size                  | Output channels |
|------------------------------------------------------------------------------------|------------------------------|-----------------|
| Group convolution<br>BatchNorm+ReLU                                                | $3 \times 3$                 | 16              |
| $E^4$ -layer<br>BatchNorm+ReLU<br>Spatial-wise max pooling                         | $5 \times 5$<br>$2 \times 2$ | 16              |
| $E^4$ -layer<br>BatchNorm+ReLU+Dropout( $p=0.1$ )                                  | $5 \times 5$                 | 16              |
| $E^4$ -layer<br>BatchNorm+ReLU+Dropout( $p=0.1$ )<br>Spatial-wise max pooling      | $5 \times 5$<br>$2 \times 2$ | 16              |
| $E^4$ -layer<br>BatchNorm+ReLU+Dropout( $p=0.1$ )                                  | $5 \times 5$                 | 16              |
| $E^4$ -layer<br>BatchNorm+ReLU+Dropout( $p=0.1$ )<br>lobal max group pooling layer | $5 \times 5$                 | 16              |
| Fully connected+Softmax                                                            |                              | 10              |

14

15 Here, Group-wise Global max pooling is the operation act on each channel:

$$f_i = \max_{g \in \mathcal{G}} f_i(g), \quad (13)$$

16 and  $i$  denotes the channel index.

## 17 C Details of CIFAR10 and CIFAR100 Experiments

18 The ResNet-18 is composed of an initial convolution layer, followed by 4 stage Res-Blocks and one  
 19 final classification layer. Each stage contain 2 Res-Blocks and each block contain 2 convolution  
 20 layers. In each stage, the channel dimension change and spatial-wise pooling only occur at and after  
 21 the first layer of the first block. From initial convolution layer to 4th stage Res-Blocks, the change of  
 22 the output channel dimension is  $64 \rightarrow 64 \rightarrow 128 \rightarrow 256 \rightarrow 512$ , and spatial-wise pooling is carried out at  
 23 2nd, 3rd, and 4th stage Res-Blocks. In our implementation, we replace all the conventional layers  
 24 with  $p4$  ( $p4m$ ) convolutions layers without changing kernel size, and the output channel dimension  
 25 is  $32 \rightarrow 32 \rightarrow 64 \rightarrow 128 \rightarrow 256$  ( $22 \rightarrow 22 \rightarrow 44 \rightarrow 88 \rightarrow 176$ ). Besides, we increase the width of each layer  
 26 by  $\sqrt{4}$  ( $\sqrt{8}$ ) to keep the number of parameters almost invariant. This is the construction of  $p4$ -R18  
 27 ( $p4m$ -R18). Then, for building our model  $p4$ - $E^4$ R18 ( $p4m$ - $E^4$ R18), the second group convolution  
 28 layer in each Res-Block of  $p4$ -R18 ( $p4m$ -R18) is replaced by our  $E^4$ -layer with  $k = 3$ ,  $r = 2$ , and  
 29  $s = C_l/2$ , where  $C_l$  is the channel dimension at current layer.

## 30 References
